# Supplementary material
Source: PubMed Central journal article supplement (PMC1149401)
Supplement: pnas_0408223102_3.pdf [file pnas_0408223102_3.pdf]

CTGGATCCTGCGCGGGACGTCCTTTGTTTACGTCCCGTCGGCGCTGAATCCTGCGGACGACCCCTTCTCGGGGTCGCTTGGGACTCTCTCGT-CCCCTTCTCCGTCTGCCGTTCCGACCGACCACGGGGCGCACCTCTCTTTACGCGGACTCCCCGTCTGTGCCTTCTC

.....A.....A.A.....A.AA.....A.....A.....AAA.....-.....A.....AAAA.A.....A.A.....  
..AA...A.....A.....AA.A.A.....A.AA.A.....-.....A.A.A.A.A.A.....A.....A.....A.AA.....A.A.A.....  
..AA...A.....A.....A.....A.AA.....AAA.....-.....A.A.....AAAA.A.....A.AA.....  
..AA...A.A.....A.....A.A.....A.....AAA.....A.-.....A.....A.....A.....A.....A.AA.....A.A.A.....  
.....A.A.....A.AA.....A.....A.....AAA.....-.....A.....AAAA.A.....A.A.....  
.....A.A.....A.....AA.....-.....A.A.....A.A.....AA.A.A.....A.....A.....  
.....A.A.A.A.....A.A.A.....A.A.....-.....A.....A.A.....A.A.....  
.....A.....A.....A.A.....AAA.....A.-.....A.....A.....A.....A.AA.....A.A.....  
..AA...A.....A.A.....A.A.....A.A.....-.....A.A.....AAAA.A.....A.AA.....A.....  
.....A.....A.....A.....A.....-.....A.A.....AAAA.A.....A.AA.....A.....  
.....A.A.A.A.....A.A.A.....A.A.....-.....A.....A.A.....A.A.....A.A.....  
..AA...A.....A.....AA.A.A.....A.AA.A.....-.....A.A.A.A.A.A.....A.A.....A.A.A.....  
.....A.A.A.....A.AA.A.....A.....AAA.A.....-.....AAA.....A.A.....AAAA.A.....A.AA.....  
.....A.A.A.....A.AA.A.....AAA.A.....-.....A.....A.A.....AAAA.A.....A.AA.....  
.....A.A.A.....A.....A.....A.....-.....A.....A.A.....AA.A.....A.AA.....

T.....T.....T.T.....TT.T.....T.....T.T.-.....T.TT.T.T.....T.-.T.T.....T.....T.T.....T.T.T  
.....T.....T.....TT.T.....T.T.....T.T.T.-.....TTTT.TT.....TT.....T.T.....T.....T.T.T  
.....TT.T.....T.....T.T.T.-TT.....T.TT.T.T.....TT.....T.....T.T.....T.....TTT.....T.T.T  
.....T.....T.....TT.T.....T.T.....T.T.T.-.....T.TT.T.T.....TT.....T.T.....T.....T.T.T  
.....TTT.T.....T.....TT.T.....T.T.....T.T.T.T.-.....T.TT.T.T.....T.....T.....T.T.....T.T.T  
.....T.....T.T.....T.T.T.T.-TTTT.T.T-.T.TT.....TT.....T.....T.T.....T.T.....TTTT.T.....TT.T.T  
.....T.....T.....TT.T.....T.T.....T.T.T.-TT.....T.TT.T.T.....T.....T.....T.T.....T.T.T
