# Supplementary material
Source: PubMed Central journal article supplement (PMC1149401)
Supplement: pnas_0408223102_4.pdf [file pnas_0408223102_4.pdf]

CTGGATCCTGCGGGGACGTCCTTTGTTTACGTCCCGTCGGCGCTGAATCCTGCGGACGACCCCTTCGCGGTCGCTTGGGACTCTCTCGT-CCCCTTCTCGCTGCGCGTTCCGACCGACCACGGGGCGCACCTCTCTTTACGCGGACTCCCCTGTGTGCCTTCTC

. . . . . A . . . A . . . T . . . . . T . A . A . A . . . . . A . G . A . . . . . AA . . . A . . . AAA . . . . . - . . . . . A . . . A . . . AA . . . A . T . . . . . A . A . . . . . A . . . . .  
. AA . . . . . AA . . . . . A . . . . . A . . . . . T . A . . . . . AA . . . . . - . . . . . A . . . . . A . . . . . AAA . A . . . . . AA . . . . . A . A . . . . . A . . . . .  
. AA . . . . . A . AA . . . . . A . . . . . AA . A . A . . . . . A . . . . . AAA . A . AAA . . . . . A . . . . . A . . . . . AAA . A . . . . . A . . . . . A . A . . . . . A . A . . . . .  
. A . . . . . A . A . A . . . . . A . . . . . A . . . . . AAA . AA . . . . . - . . . . . A . . . . . A . . . . . AAA . . . . . A . A . . . . . A . A . . . . .  
. AA . . . . . AA . . . . . AA . A . A . . . . . A . . . . . AAA . A . AA . . . . . - . . . . . A . . . . . A . . . . . AA . C . . . . .  
. AA . . . . . A . AA . . . . . A . . . . . A . . . . . AAA . AAA . . . . . - . . . . . A . . . . . A . . . . . AA . . . . . A . AA . . . . .  
. AA . . . . . AA . . . . . A . . . . . AA . A . A . . . . . A . . . . . AA . A . AA . . . . . - . . . . . A . . . . . A . . . . . AAA . . . . . A . AA . . . . . A . . . . .  
. AA . . . . . AA . . . . . A . . . . . A . A . A . . . . . AA . AA . . . . . - . . . . . A . . . . . A . . . . . AAA . . . . . A . . . . . A . A . . . . .  
. . . . . A . . . . . A . A . . . . . A . AA . A . . . . . A . . . . . AA . . . . . - . . . . . A . . . . . A . . . . . AAA . A . . . . . A . . . . . A . A . . . . .  
. AA . . . . . AA . . . . . A . . . . . A . . . . . A . . . . . AAA . AAA . . . . . - . . . . . A . . . . . A . . . . . AAA . A . . . . . A . . . . .  
. A . . . . . A . AA . . . . . A . . . . . A . . . . . AAA . AAA . . . . . - . . . . . A . . . . . A . . . . . AAA . A . . . . . A . . . . .  
. A . . . . . AA . . . . . A . . . . . A . A . A . . . . . AA . A . AA . T . . . . . A . . . . . A . . . . . AAA . A . . . . . A . . . . . A . A . . . . .  
. AA . . . . . AA . . . . . A . A . A . . . . . A . A . A . . . . . AA . A . AA . . . . . - . . . . . A . . . . . A . . . . . AAA . A . . . . . A . AA . . . . . A . . . . .  
. A . . . . . A . . . . . A . . . . . A . . . . . A . . . . . AA . AA . . . . . - . . . . . A . . . . . A . . . . . AAA . A . . . . . A . . . . .  
. AA . . . . . AA . . . . . A . A . A . . . . . A . A . A . . . . . AA . A . AA . . . . . - . . . . . A . . . . . A . . . . . AAA . . . . . A . . . . . A . A . . . . .  
. A . . . . . AA . . . . . A . . . . . A . A . A . . . . . AAA . AA . . . . . - . . . . . A . . . . . A . . . . . AAA . . . . . A . . . . .  
. A . . . . . AA . A . . . . . A . . . . . A . A . A . . . . . AAA . A . AA . . . . . - . . . . . A . . . . . A . . . . . AAA . A . . . . . A . . . . .  
. AA . . . . . A . AA . . . . . A . . . . . A . A . A . . . . . AA . A . AA . . . . . - . . . . . A . . . . . A . . . . . AAA . A . . . . . A . . . . .  
. A . . . . . A . A . A . . . . . A . A . A . . . . . AAA . A . AA . . . . . - . . . . . A . . . . . A . . . . . AAA . A . . . . . A . . . . .  
. A . . . . . AA . . . . . A . . . . . A . A . A . . . . . AAA . A . AA . . . . . - . . . . . A . . . . . A . . . . . AAA . A . . . . . A . . . . .  
. AA . . . . . AA . . . . . A . . . . . AA . A . A . . . . . AA . A . AA . . . . . - . . . . . A . . . . . A . . . . . AAA . A . . . . . A . . . . .  
. AA . . . . . AA . . . . . A . . . . . AA . A . A . . . . . A . A . A . . . . . AA . A . AA . . . . . - . . . . . A . . . . . A . . . . . AAA . A . . . . . A . . . . .  
. A . . . . . A . AA . . . . . A . . . . . A . A . AA . . . . . AA . . . . . C . AA . . . . . - . . . . . A . . . . . A . . . . . AAA . . . . . C . . . . . A . A . . . . . A . A . . . . .  
. . . . . AA . . . . . A . . . . . AA . A . A . . . . . A . . . . . AA . . . . . - . . . . . A . . . . . A . . . . . AAA . A . . . . . A . . . . .  
. AA . . . . . A . . . . . A . . . . . A . A . A . . . . . AAA . A . AA . . . . . - . . . . . A . . . . . A . . . . . AAA . A . . . . . A . . . . .  
. A . . . . . AA . . . . . A . . . . . A . A . A . . . . . AAA . A . AA . . . . . - . . . . . A . . . . . A . . . . . AAA . A . . . . . A . . . . .  
. A . . . . . C . A . . . . . A . . . . . A . A . . . . . AA . A . AA . . . . . - . . . . . A . . . . . A . . . . . AAA . . . . . A . . . . .

. A . . . . . AA . . . . . A . . . . . A . . . . . AAA . . . . . AA . . . . . - . TT . . . TT . . . T . T . T . . . . . TTT . . . . .  
. . . . . T . . . . . T . A . . . . . TT . T . . . . . T . A . . . . . T . T . TA . . . . . AA . T . T . T . - . TT . T . T . . . . . T . T . T . AA . . . . . T . T . T . . . . . TTT . . . . . T . T  
. . . . . TT . . . . . T . . . . . C . T . TTT . T . . . . . TT . T . . . . . TT . T . T . . . . . T . AA . T . T . T . - . TTT . T . T . . . . . T . TT . T . TT . T . . . . . T . T . T . . . . . T . T . T .  
. . . . . TT . . . . . T . . . . . T . TT . T . . . . . TT . T . . . . . TT . T . . . . . AA . T . T . T . - . TT . T . TT . T . T . . . . . T . T . . . . . TTT . . . . . T . T . T .  
. . . . . TT . . . . . T . . . . . A . TT . A . T . A . . . . . TT . T . TA . . . . . A . T . T . T . - . TT . TT . T . T . T . . . . . T . T . . . . . TTT . . . . . T . . . . .  
. . . . . TT . . . . . T . . . . . A . TT . A . T . A . . . . . TT . T . A . . . . . T . T . T . - . TT . TT . T . T . T . T . . . . . TTTT . . . . . T . . . . .  
. A . . . . . T . . . . . AA . . . . . T . . . . . TT . T . A . A . . . . . T . A . A . . . . . T . A . . . . . AA . T . T . T . - . TT . T . . . . . T . T . T . AA . . . . . T . T . . . . . TTTT . . . . . T . T  
. A . . . . . T . . . . . AA . . . . . T . . . . . TT . T . A . . . . . T . T . TA . . . . . AA . T . T . T . - . TT . T . T . . . . . T . T . T . AA . . . . . T . T . T . . . . . TTT . . . . . T . T  
. . . . . A . . . . . A . . . . . T . . . . . T . A . A . A . . . . . A . G . A . . . . . AA . . . . . AAA . . . . . - . . . . . A . . . . . AAA . A . T . . . . . A . A . . . . .

. . . . . T . . . . . T . . . . . T . . . . . T . . . . . T . . . . . A . . . . . T . T . - . TT . TT . . . . . T . TT . T . T . . . . . T . T . T . . . . . TTT . . . . . T . T  
. . . . . TT . . . . . T . . . . . T . TTT . T . . . . . TT . T . . . . . T . . . . . T . T . T . - . TTTT . T . T . T . . . . . T . TT . . . . . T . . . . . T . T . T . . . . . TTT . . . . . T . T  
. . . . . T . . . . . T . . . . . T . . . . . TT . T . . . . . T . T . . . . . T . T . - . TT . T . T . . . . . T . T . T . . . . . TTTT . . . . . T . . . . . T
