# Supplementary material
Source: PubMed Central journal article supplement (PMC1149401)
Supplement: pnas_0408223102_5.pdf [file pnas_0408223102_5.pdf]

CTGGATCCTGCGCGGGACGTCC TTTGTTTACGTCCC GTCGGCGCTGAATCCTGCGGACGACCCTTCTCGGGGCCGCTTGGGAATCTCTCGT-CCCCTTCTCTGCCTGCCGTTCCAGCCGACCACGGGGCGCACCTCTCTTTACGCGGACTCCCCGTCTGTGCCTTCTC

..AA.....A.....A.....AA.A.A.....A.AA.A.....AA.....AAA.....A.-.....A.....A.A.....A.....AA.....A.A.....  
.....A.A.A.....A.AA.A.....AAA.....-.....A.....A.A.....AAAA.A.....A.AA.....  
..AA.....AA.....A.....A.AA.....A.....A.A.....AAA.....AAA.....A.-.....A.A.A.....A.A.....AAA.....A.....  
..AA.....T.A.AA.....A.....A.....C.A.....C.....AAA.A.AAA.C.....-.....A.A.....AAA.A.....A.A.T.....A.....  
..AA.....A.AAA.....AA.....A.....C.AA.A.....AA.A.A.AAA.....-.....A.A.....AAAA.A.....A.....A.....  
..AA.....A.....A.....A.A.A.....A.AA.A.....AAA.....-.....A.....A.A.....AAAA.A.....  
..AA.....AA.....A.....A.AA.....A.....A.A.....AAA.....AAA.....A.-.....A.A.A.....A.A.....AAA.....T.....  
..AA.....AA.....A.....A.A.A.A.....A.....AA.A.A.AA.....-.....A.....A.....A.A.....A.....A.....A.....  
.....AA.A.....A.....A.A.....AAAA.A.AAA.....-.....A.....A.....A.A.....A.....A.....A.....  
.....T.....AA.A.A.....A.AA.A.....A.A.A.AAA.....-.....A.A.....A.A.....A.....A.....  
..AA.....AA.....A.....A.....A.....A.....TA.....AAAA.....AAAG.....-.....A.A.....A.....A.....A.....  
..AA.....AA.....AA.A.A.....A.....AA.A.A.AAG.....-.....A.A.....AA.A.....A.....A.....A.A.....  
..AA.....A.A.AAA.....A.....A.A.....A.....A.....AAA.....AAG.....A.-.....A.....AA.....AA.....  
..AA.....A.....A.AA.A.....A.....AA.A.....AAAG.....A.-.....A.A.....A.....A.A.....A.....  
..AA.....A.....A.A.....A.A.A.....A.A.....AAA.....AAG.....-.....A.....A.....GA.A.....AAA.A.....A.....A.A.....  
..AA.....A.A.AA.....A.....A.A.A.....A.....TAA.....AAAG.....A.-.....A.....GA.A.....AAA.....C.....A.....  
..AA.....AA.....A.....AA.A.A.....A.....AA.A.A.AAG.....-.....GA.A.....AAA.....A.AA.....A.A.....  
..AA.....A.A.AA.....A.....A.A.A.A.....A.....AAAA.A.AA.....-.....GA.A.....AA.A.....AA.....  
..AA.....AA.....A.....A.A.A.A.....A.....AA.A.A.AA.....-.....A.....A.....GA.A.....A.....A.....  
..AA.....AA.....A.....A.....A.....A.A.....AAAA.A.AAA.....-.....CA.A.....GA.....AAA.....A.....A.A.....  
..AA.....A.A.....A.....A.A.A.A.....A.A.....AA.A.....AAG.....A.-.....A.A.....AAA.A.....A.....A.....
