# Supplementary material
Source: PubMed Central journal article supplement (PMC1149401)
Supplement: pnas_0408223102_6.pdf [file pnas_0408223102_6.pdf]

CTGGATCCTGCGAGGGACGTCCTTTGTCTACGTCCCGTCAGCGCTGAATCCTGCGGACGACCCGTCTCGGGGTCGCTTGGGGATCTATCGT-CCCCTCCTGCGTCTGCCGTTCCAGCCGACCACGGGGCGCACCTCTCTTTACGCGGTCTCCCCGTCTGTGCCTTCTC

..AA.....A.AA.....A.....A.....AA.A.....AAA..A..AAAA.....-.....A.....A.....AAAA.A.....A.A.....A.....  
..AA.....A.A.AAA.....A.....A.....A.....A.AA.A.....A.....AAA..A..AAA.....A-.....A.A..A.A.....A.A.....AAA.....A.....A.A.....  
..AA.....A.A.AA.....A.....A.....A.A.A.....A.AA.A.....A.....AAA..A..A.A.....-.....A.....A.....AAAA.....A.A.....A..A.A.....  
.....A.A.A.....A.....A.....A.....A.A.A.....A.A.....A.....AAAA.....A-.....A.....A.....A.A.....A.A.....  
..AA.....A.....A.....A.....A.A.A.....A.AA.A.....AAAA.....A-.....A.A.....A.A.....A.A.....A.A.....  
.....AA.....A.....A.....A.....A.AA.A.....AAA.....AAA.....-.....A.....AAA.....A.A.....A.A.....  
..AA.....A.A.AAA.....A.....A.....A.....A.AA.....A.....A.....A.....A.....A-.....A.A..A.....A.A.....A.....A.A.....  
..AA.....A.A.AAA.....A.....A.....A.....A.AA.....A.....A.....A.....A.....-.....A.A..A.A.....A.A.....A.....A.A.....  
..AA.....A.A.AAA..A.....A.....A.....A..A.....AA.....AA.A.A.....AAA.....-.....A.....A.....A.....AAA.....A.....A.....  
..AA.....A.AAA-A.....A.....A.....A.....A.A.....A.AA.A.....AAAA.....A-.....A.....A.A.....A.A.....  
..AA.....A.A.....A.....A.....A.....AA.A.....AA.A.A.....AAA.....-.....A.....A.....A.A.....A.A.....A.A.....  
..AA.....A.A.....A.....A.....A.....AA.A.....A.....AAAA.....A-.....A.....A.A.....A.A.....AAA.A.....  
.....A.....A.A.A.....A.....A.....AA.A.....AAAA.....-.....A.....A.....A.....AA.A.....A.A.....AAA.A.A.....  
.....A.A.AA.....A.....A.....A.....A.....AAA.....AAA.....-.....A.....A.....AT.....AAA.A.....A.....A.....  
..AA.....A.A.....A.....A.....A.....AA.A.....A.AA.....-.....A.A..A.A.....A.A.....AG.A.A.....  
..AA.....A..AAA.A.....A.....A.....A.....AA.A.....A.A.....AAA.....-.....A.A..A.A.....T.....AAA.A.....A.....A.....  
..A.....A.AA.....-.....C.....A.....A.AA.....A.....AA.....A.AAG.....-.....A.....A.....AA.....A.AA.....A.A.A.....  
.....A.A.AA.....A.....A.....A.....A.A.....G..A.....AAA.....AAAA.....-.....A.....AA.....A.....A.....  
..A.....A.AA.....A.....A.....A.....A.AA.....A.....AA.....A.AAG.....-.....A.....A.....AA.....A.AA.....A.A.A.....

T.A...T...A.....A.....A.....A.TTA...T.A.....AAAA.....-.....A.....A.....A.....A.....
